# Supplementary material for: Bovine Tuberculosis: The Emergence of a New Wildlife Maintenance Host in Ireland
Source: Front Vet Sci. 2021 Mar 25;8:632525. doi: 10.3389/fvets.2021.632525 (PMC8027074; doi:10.3389/fvets.2021.632525)
Supplement: Supplementary file 1 [file Data_Sheet_1.xlsx]

## Sheet: Table S1
County	2000	2001	2002	2003	2004	2005	2006	2007	2008	2009	2010	2011	2012	2013	2014	2015	2016	2017	2018
Carlow	65	99	84	85	150	110	52	165	129	175	236	199	190	178	194	221	275	310	433
Cavan	2	3	3	0	0	3	0	8	2	8	0	7	4	2	9	7	111	164	199
Clare	10	15	10	10	2	14	17	26	23	45	52	40	26	49	48	63	1261	2022	2419
Cork	40	66	79	94	85	129	146	163	115	310	418	459	419	436	418	433	1104	1489	1580
Donegal	0	0	5	4	6	9	16	21	18	47	45	34	55	29	37	52	922	1181	1260
Dublin	130	145	181	453	262	370	378	534	602	725	685	775	696	561	583	684	722	966	1024
Galway	12	9	13	8	9	24	37	45	87	53	71	104	130	109	65	91	2382	2484	2751
Kerry	379	672	542	676	744	640	841	931	1021	1341	1483	1485	1412	1323	1265	1651	1780	2089	1986
Kildare	0	4	0	20	36	48	38	32	101	51	90	125	116	135	83	72	168	254	323
Kilkenny	1	20	9	6	12	9	9	7	18	20	12	21	23	43	33	21	198	255	320
Laois	7	6	3	15	36	57	54	62	78	66	55	61	85	103	72	43	1250	1530	1356
Leitrim	0	0	0	0	0	0	1	5	1	2	2	35	38	8	12	28	104	132	215
Limerick	3	0	1	2	1	2	14	3	3	15	17	38	9	14	21	16	301	309	331
Longford	0	0	0	0	2	0	0	2	0	2	0	1	0	0	0	0	53	58	49
Louth	0	0	0	0	0	0	0	0	0	0	0	1	0	0	2	0	47	59	88
Mayo	0	7	0	0	0	0	1	26	5	5	8	15	22	23	64	63	1035	1127	1312
Meath	1	0	0	0	0	3	2	26	8	8	4	0	12	0	5	4	255	244	268
Monaghan	6	9	6	10	9	6	7	8	5	4	6	9	9	11	2	23	262	255	315
Offaly	2	8	1	7	5	2	29	45	26	52	35	26	16	19	11	24	1082	1330	1323
Roscommon	3	1	2	4	7	8	18	13	9	12	6	13	12	9	20	15	357	384	465
Sligo	2	0	0	1	5	2	1	2	25	22	31	39	59	54	55	49	675	774	868
Tipperary	16	37	26	29	51	38	77	94	90	159	195	144	165	106	81	127	3279	3707	4120
Waterford	8	106	124	15	141	110	153	210	127	161	53	115	77	94	45	115	1753	2282	2284
Westmeath	1	1	17	1	5	2	1	8	12	2	6	17	4	4	4	1	98	161	182
Wexford	105	31	33	48	43	39	75	164	209	137	128	167	140	147	146	245	329	244	263
Wicklow	3779	4361	4436	4981	5140	6441	7256	7787	8809	11424	11975	10443	10398	10038	9512	10352	12972	13328	15422

## Sheet: Table S2
County	2000	2001	2002	2003	2004	2005	2006	2007	2008	2009	2010	2011	2012	2013	2014	2015	2016	2017	2018
Carlow	260	396	252	340	600	330	156	660	387	700	944	597	570	534	776	884	924	1088	1584
Cavan	8	12	12	0	0	12	0	32	6	32	0	28	12	6	36	21	6	44	15
Clare	40	60	30	40	6	56	68	104	69	180	208	120	78	196	144	252	159	444	144
Cork	160	264	316	376	255	516	584	652	345	1240	1672	1836	1257	1744	1254	1732	2352	3320	3392
Donegal	0	0	20	12	24	36	64	84	54	188	135	102	220	87	148	208	126	304	195
Dublin	520	580	724	1812	786	1480	1512	2136	2408	2900	2055	3100	2088	1683	2332	2736	1950	3128	2280
Galway	48	27	52	24	36	96	148	180	348	159	284	416	520	327	195	364	222	436	258
Kerry	1516	2688	1626	2704	2976	1920	3364	3724	4084	5364	5932	5940	4236	3969	3795	6604	6720	7944	5706
Kildare	0	16	0	80	144	192	114	96	404	153	360	500	348	540	249	216	424	584	399
Kilkenny	4	80	27	18	48	27	36	21	72	80	36	84	92	172	99	63	144	164	216
Laois	28	18	9	60	144	228	162	248	312	198	165	244	340	412	216	129	93	328	183
Leitrim	0	0	0	0	0	0	4	20	3	8	8	140	152	24	48	112	60	112	204
Limerick	12	0	4	8	3	8	56	9	12	60	68	152	27	56	84	48	164	48	136
Longford	0	0	0	0	8	0	0	8	0	8	0	4	0	0	0	0	4	64	0
Louth	0	0	0	0	0	0	0	0	0	0	0	4	0	0	8	0	12	3	3
Mayo	0	28	0	0	0	0	4	104	15	20	32	60	88	92	256	189	156	126	240
Meath	4	0	0	0	0	12	6	104	24	32	12	0	48	0	20	12	120	36	36
Monaghan	24	36	18	40	27	18	28	32	15	12	24	36	36	44	6	92	21	36	56
Offaly	8	32	3	28	15	6	116	180	78	208	105	78	48	76	33	96	48	200	216
Roscommon	12	3	8	16	28	32	72	39	27	48	18	52	36	27	80	45	12	72	112
Sligo	8	0	0	4	20	6	3	8	100	66	124	156	236	162	220	147	228	248	392
Tipperary	64	148	78	116	204	114	308	376	270	636	780	432	660	318	243	508	792	594	828
Waterford	32	424	496	45	564	330	612	840	381	644	159	460	231	376	135	460	252	616	720
Westmeath	4	4	68	3	20	6	3	32	48	6	24	68	12	16	16	3	12	52	36
Wexford	420	93	132	192	129	117	300	656	836	411	384	668	420	588	438	980	1216	660	964
Wicklow	15116	17444	17744	19924	20560	25764	29024	31148	35236	45696	47900	31329	31194	30114	28536	41408	46696	47784	54108

## Sheet: Table S3
County Name	County Area	TOTAL CITY	TOTAL WATER	TOTAL WILD	TOTAL AGRI	TOTAL FOREST	TOTAL WETLAND	TOTAL PASTURE
CARLOW	896.04	23.71	0.19	872.14	791.86	48.98	31.18	539.01
CAVAN	1935.19	24.47	57.16	1853.56	1566.37	140.47	146.81	1284.08
CLARE	3240.89	58.75	80.55	3101.59	2140.36	739.89	221.49	1701.43
CORK	7463.64	180.45	45.24	7237.95	5801.68	930.19	505.47	4755.22
DONEGAL	4857.54	75.51	78.74	4703.29	1854.29	979.92	1868.86	1305.98
DUBLIN	925.24	386.54	2.65	536.05	463.71	43.21	29.06	190.34
GALWAY	6150.33	79.5	284.96	5785.87	3397.57	806.52	1582.14	2923.81
KERRY	4746.65	53.89	75.08	4617.68	2253.45	887.3	1477.34	1940.58
KILDARE	1694.97	107.05	1.17	1586.75	1402.92	91.01	92.99	977.46
KILKENNY	2061.86	36.05	3.08	2022.73	1840.17	170.32	12.62	1584.65
LAOIS	1719.81	34.25	0.34	1685.22	1363.5	252.39	69.09	1066.12
LEITRIM	1589.96	10.67	78.81	1500.48	955.68	305.3	239.11	265.91
LIMERICK	2686.33	73.02	2.63	2610.68	2280.94	256.78	73.08	2116.33
LONGFORD	1091.18	11.06	46.63	1033.49	836.13	77.52	119.95	799.78
LOUTH	825.44	55.39	2.41	767.64	698.43	41.21	27.9	417.1
MAYO	5594.02	51.38	217.14	5325.5	2565.89	666.46	2093.25	2125.71
MEATH	2341.47	77.6	5.77	2258.1	2191.25	45.67	21.2	1727.24
MONAGHAN	1295.2	24.65	11.55	1259	1198.15	45.67	15.23	1088.29
OFFALY	2000.88	36.96	1.77	1962.15	1400.42	228.59	333.06	1226.12
ROSCOMMON	2547.8	24.15	94.53	2429.12	1859.56	215.65	354.08	1638.94
SLIGO	1836.39	24.99	42.68	1768.72	1141.69	262.44	364.6	921.69
TIPPERARY	2046.23	56.54	48.12	1941.57	3478.1	474.56	246.95	3136.63
WATERFORD	1837.85	44.58	7.68	1785.59	1362.41	330.65	92.62	1204.34
WESTMEATH	1839.28	43.46	70.13	1725.69	1469.81	123.9	132.06	1363.15
WEXFORD	2358.18	56.25	17.75	2284.18	2122.44	130.9	30.83	1467.63
WICKLOW	2025.93	66.45	29.07	1930.41	1100.21	491.31	338.8	841.68

## Sheet: Table S4
						CORRELATION values from the 'FINAL' herd-level model
		density within area	AICc	selected		sika.dens	cattle.dens	badger.dens	year	sika:yr	cattle:yr	badger:yr
		whole county	524.411			0.2462	5.59e-11	3.43e-07	< 2e-16	0.0235	0.2289	0.0108
		excluding city and water	524.192			0.1616	3.26e-11	3.51e-07	< 2e-16	0.0276	0.2238	0.0116
		agricultural land	524.324			0.25	5.63e-11	3.19e-07	< 2e-16	0.0222	0.2246	0.0109
		agri and forestry	524.199			0.2086	4.37e-11	3.23e-07	< 2e-16	0.0235	0.226	0.0111
		pasture	523.949			0.1278	2.57e-11	3.3e-07	< 2e-16	0.0297	0.2128	0.0122
		pasture and forestry	523.905	*		0.0948	1.89e-11	2.92e-07	< 2e-16	0.0334	0.2085	0.0132
				'starred' value		NS	***	***	***	*	NS	*

## Sheet: Table S5
						CORRELATION values from the 'FINAL' individual-level model
		density within area	AICc	selected		sika.dens	cattle.dens	badger.dens	year	sika:yr	cattle:yr	badger:yr
		whole county	570.913			1.21e-05	2.27e-06	0.00265	< 2e-16	0.0858	4.33e-05	0.70867
		excluding city and water	571.548			1.34e-05	1.83e-06	0.00237	< 2e-16	0.07609	5.9e-05	0.70933
		agricultural land	570.693	*		1.01e-05	1.82e-06	0.003	< 2e-16	0.0876	4.95e-05	0.7193
		agri and forestry	571.149			1.31e-05	1.83e-06	0.00261	< 2e-16	0.07615	5.85e-05	0.72115
		pasture	571.735			1.28e-05	1.44e-06	0.00253	< 2e-16	0.07458	7.51e-05	0.72608
		pasture and forestry	572.933			2.32e-05	1.66e-06	0.0018	< 2e-16	0.06084	9.48e-05	0.72109
				'starred' value		***	***	**	***	NS	***	NS

## Sheet: Table S6
County	Badger population estimate for all years of the study
Carlow	623
Cavan	1596
Clare	2663
Cork	6080
Donegal	1760
Dublin	146
Galway	2416
Kerry	3259
Kildare	919
Kilkenny	3251
Laois	994
Leitrim	1163
Limerick	2550
Longford	1164
Louth	578
Mayo	1891
Meath	1662
Monaghan	1439
Offaly	1581
Roscommon	1599
Sligo	1599
Tipperary	4319
Waterford	1660
Westmeath	1658
Wexford	2268
Wicklow	1393

## Sheet: Table S7
						CORRELATION values from the 'FINAL' herd-level model
		density within area	AICc	selected		sika.dens	cattle.dens	badger.dens	year	sika:yr	cattle:yr	badger:yr
		whole county	526.298			2.83e-05	< 2e-16	4.39e-07	< 2e-16	0.683022	1.72e-07	0.000821
		excluding city and water	525.33			2.25e-05	< 2e-16	4.01e-08	< 2e-16	0.68038	1.23e-07	0.000419
		agricultural land	528.072			0.00299	< 2e-16	0.67503	< 2e-16	0.20099	6.71e-06	0.64336
		agri and forestry	527.326			0.000521	< 2e-16	0.004909	< 2e-16	0.383511	1.97e-06	0.0324
		pasture	281.267	*		0.0948	1.89e-11	2.92e-07	< 2e-16	0.0334	0.2085	0.0132
		pasture and forestry	394.667			0.00038	< 2e-16	1.04e-10	< 2e-16	0.28797	0.00277	5.87e-05

## Sheet: Table S8
						CORRELATION values from the 'FINAL' individual-level model
		density within area	AICc	selected		sika.dens	cattle.dens	badger.dens	year	sika:yr	cattle:yr	badger:yr
		whole county	583.529			8.79e-08	< 2e-16	0.0326	< 2e-16	0.1262	8.05e-07	0.3848
		excluding city and water	581.159			7.8e-08	< 2e-16	0.0141	< 2e-16	0.1257	7.65e-07	0.329
		agricultural land	587.172			4.88e-07	< 2e-16	0.1357	< 2e-16	0.0959	7.4e-08	0.395
		agri and forestry	587.862			1.21e-07	< 2e-16	0.0361	< 2e-16	0.1077	2.6e-07	0.6729
		pasture	502.42	*		2.32e-05	1.66e-06	0.00187	< 2e-16	0.06084	9.48e-05	0.72109
		pasture and forestry	520.37			4.02e-07	6.85e-09	0.000202	< 2e-16	0.072319	0.000141	0.375821
				'starred' value			***		***	NS	***	NS

## Sheet: Table S9
County	2000	2001	2002	2003	2004	2005	2006	2007	2008	2009	2010	2011	2012	2013	2014	2015	2016	2017	2018
Carlow	1576	1511	1468	1458	1458	1451	1439	1359	1354	1340	1353	1360	1333	1340	1330	1330	1325	1315	1296
Cavan	5464	5368	5288	5203	5185	5152	5113	5018	4970	4945	4915	4857	4878	4860	4817	4820	4875	4851	4860
Clare	6748	6636	6544	6433	6389	6369	6361	6413	6264	6226	6282	6164	6249	6265	6165	6203	6164	6101	6036
Cork	13743	13481	13209	13023	12860	12799	12635	12579	12294	12289	12296	12007	12040	12003	11896	11929	12064	11942	11770
Donegal	6629	6444	6305	6108	6049	5899	5824	5766	5671	5609	5579	5560	5549	5519	5452	5597	5375	5349	5202
Dublin	559	500	486	453	442	448	413	408	413	401	398	391	384	392	388	386	379	387	372
Galway	13819	13558	13205	12920	12828	12564	12584	12453	12019	11896	11796	11599	11611	11600	11422	11411	11212	11072	10936
Kerry	7876	7618	7477	7333	7337	7278	7246	7189	7038	7094	6895	6952	6846	6765	6801	6818	6893	6754	6642
Kildare	2258	2236	2172	2034	2017	2046	1973	1942	1893	1857	1861	1921	1881	1922	1914	1927	1910	1892	1843
Kilkenny	3536	3476	3436	3389	3320	3318	3283	3242	3232	3157	3143	3137	3150	3183	3174	3173	3120	3084	3044
Laois	3141	3105	3043	2979	2974	3015	2967	2994	2929	2901	2878	2915	2879	2884	2876	2922	2880	2858	2811
Leitrim	3640	3600	3483	3394	3355	3342	3319	3204	3159	3118	3106	3093	3064	3046	2988	3023	2979	2930	2890
Limerick	6374	6133	6136	6144	6088	5920	5793	5695	5601	5547	5627	5487	5514	5546	5483	5507	5457	5435	5351
Longford	2730	2695	2588	2550	2543	2541	2533	2506	2466	2439	2445	2431	2442	2396	2384	2414	2407	2379	2356
Louth	1424	1366	1379	1370	1316	1283	1242	1236	1182	1168	1196	1190	1186	1204	1196	1228	1220	1195	1186
Mayo	11746	11523	11137	10912	10831	10660	10699	10405	9997	9861	9772	9709	9618	9637	9501	9338	9193	9033	8852
Meath	4346	4344	4200	4051	4030	4032	3986	3772	3623	3602	3674	3700	3695	3758	3659	3782	3721	3694	3687
Monaghan	4520	4373	4385	4346	4363	4375	4444	4378	4239	4281	4292	4259	4256	4289	4246	4253	4298	4312	4263
Offaly	3436	3399	3336	3327	3353	3283	3224	3221	3140	3141	3170	3157	3154	3106	3091	3124	3164	3172	3126
Roscommon	6436	6269	6087	5966	5925	5887	5765	5748	5612	5569	5529	5499	5477	5476	5420	5485	5497	5459	5359
Sligo	4390	4253	4100	4063	4005	3999	3922	3868	3833	3857	3686	3646	3625	3615	3556	3566	3547	3486	3429
Tipperary	7648	7383	7284	7253	7114	7092	7175	7032	6868	6864	6861	6948	6877	6893	6851	6882	6992	7010	6926
Waterford	2577	2464	2435	2399	2352	2359	2321	2309	2347	2259	2243	2234	2242	2256	2241	2250	2214	2188	2156
Westmeath	3352	3335	3235	3202	3167	3129	3174	3088	3080	3118	3076	3141	3096	3035	3015	3037	3090	3119	3096
Wexford	3669	3616	3503	3467	3393	3343	3280	3155	3146	3126	3105	3068	3091	3122	3039	3059	3092	3058	3021
Wicklow	1905	1839	1790	1740	1720	1738	1677	1672	1660	1622	1637	1636	1650	1653	1603	1627	1637	1622	1595

## Sheet: Table S10
County	2000	2001	2002	2003	2004	2005	2006	2007	2008	2009	2010	2011	2012	2013	2014	2015	2016	2017	2018
Carlow	183	122	82	90	86	99	71	76	68	73	52	66	61	33	26	57	33	46	35
Cavan	671	425	462	439	299	264	224	271	247	234	257	190	186	212	179	187	157	263	201
Clare	386	305	310	319	278	270	304	469	448	417	350	286	310	299	299	253	235	204	225
Cork	1348	1157	1086	836	1102	995	966	1030	956	649	644	665	657	563	519	437	458	516	481
Donegal	233	237	205	232	208	231	194	183	183	188	182	185	233	214	152	106	117	104	87
Dublin	76	41	43	50	39	39	29	34	26	30	28	21	25	31	28	27	26	21	30
Galway	589	616	630	633	523	563	541	607	668	516	463	384	291	312	321	289	289	284	241
Kerry	435	306	258	219	202	201	215	300	192	168	151	184	180	188	204	139	164	180	172
Kildare	221	163	157	158	125	100	86	78	79	89	94	71	78	70	85	82	67	68	63
Kilkenny	504	424	313	304	316	275	231	270	255	220	185	206	203	168	139	133	113	99	88
Laois	193	191	188	262	141	185	155	147	179	147	154	130	140	96	92	126	120	93	100
Leitrim	227	175	138	154	110	111	126	131	164	107	84	72	69	70	88	87	46	83	58
Limerick	394	321	270	252	233	249	268	314	268	263	169	152	219	165	137	105	131	121	94
Longford	206	175	211	239	191	215	181	171	173	114	82	102	84	63	50	61	56	52	46
Louth	255	172	142	134	108	89	94	74	79	69	68	50	54	59	43	47	46	46	56
Mayo	479	486	389	270	261	182	196	309	277	255	189	182	192	184	130	134	143	197	193
Meath	706	593	515	437	243	337	309	291	340	286	281	273	264	222	194	197	201	206	193
Monaghan	629	430	336	300	232	205	171	151	139	138	149	113	114	133	106	129	168	207	371
Offaly	249	227	211	232	228	196	182	191	230	221	195	144	140	126	146	159	149	114	122
Roscommon	431	437	486	349	281	250	254	309	254	258	256	215	252	239	231	163	140	146	144
Sligo	367	288	213	170	134	160	151	149	169	168	113	93	126	104	109	124	92	105	134
Tipperary	796	667	465	504	528	525	587	561	559	468	405	281	302	270	252	243	250	257	261
Waterford	221	310	297	241	218	231	177	161	149	172	122	113	103	79	61	60	59	36	59
Westmeath	372	374	393	381	315	298	310	301	314	226	200	160	173	150	182	147	136	175	147
Wexford	411	356	350	328	300	274	248	300	288	250	241	285	234	253	208	189	139	138	129
Wicklow	203	197	188	166	181	103	116	168	133	134	190	157	166	127	130	142	147	124	35

[truncated: 4 more sheets: Table S11, Table S12, Table S13, Table S14]
